# Supplementary material for: One nanoprobe, two pathogens: gold nanoprobes multiplexing for point-of-care
Source: PubMed Central journal article supplement (PMC4527100; doi:10.1186/s12951-015-0109-1), 2015-08-07
Supplement: 12951_2015_109_MOESM1_ESM.pdf [file 12951_2015_109_MOESM1_ESM.pdf]

Additional File 1

## **One nanoprobe, two pathogens: gold nanoprob multiplexing for point-of-care**

Bruno Veigas<sup>a,b</sup>, Pedro Pedrosa<sup>a</sup>, Fábio F. Carlos<sup>a,c</sup>, Liliana Mancio-Silva<sup>d</sup>, Ana Rita Grosso<sup>d</sup>, Elvira Fortunato<sup>b</sup>, Maria M. Mota<sup>d</sup>, Pedro V. Baptista<sup>a,\*</sup>

<sup>a</sup> CIGMH, UCIBIO, Departamento de Ciências da Vida, Faculdade de Ciências e Tecnologia, Universidade Nova de Lisboa, Caparica, Portugal

<sup>b</sup> CENIMAT/I3N, Departamento de Ciência dos Materiais, Faculdade de Ciências e Tecnologia, Universidade Nova de Lisboa, Caparica, Portugal

<sup>c</sup> STABVIDA, Investigação e Serviços em Ciências Biológicas, Lda. Madan Parque, 2825-182 Caparica, Portugal

<sup>d</sup> Instituto de Medicina Molecular, Universidade de Lisboa. Av. Prof. Egas Moniz, 1649-028, Lisboa, Portugal

\* Corresponding Author: Nanomedicine@FCT, Departamento de Ciências da Vida, Faculdade de Ciências e Tecnologia, Universidade Nova de Lisboa, Campus de Caparica, 2829-516 Caparica, Portugal; Phone/Fax: +351 21 2948530; Email: pmvb@fct.unl.pt

**Table S1** Multiplex PCR primers and Au-nanoprobes sequences

| Name                         | Sequence                                       |
|------------------------------|------------------------------------------------|
| rpoB FW                      | 5' GAG AAT TCG GTC GGC GAG CTG ATC C 3'        |
| rpoB RV                      | 5' CGA AGC TTG ACC CGC GCG TAC ACC 3'          |
| Plasm FW                     | 5' CAGATGTCAGAGGTGAAATTC 3'                    |
| Plasm RV                     | 5' CATGCATCACCATCCAAGAAATCAA 3'                |
| MTBC probe                   | Thiol - 5' GAT CGC CTC CAC GTC C 3'            |
| <i>Plasmodium</i> sp. Probe  | Thiol - 5' GGCGAGTATTCGCGCAAGCG 3'             |
| MTBC Target                  | 5' TGGA ACTATGAGTTGGACGTGGAGGCGATC 3'          |
| <i>Plasmodium</i> sp. Target | 5' GTCAATTCTTTAACTTTCTCGCTTGC GCGAATACTCGCC 3' |
| Non-related Target           | 5' TTG AGT ATC AAG GTG ATC GCC TCC ACG TCC 3'  |

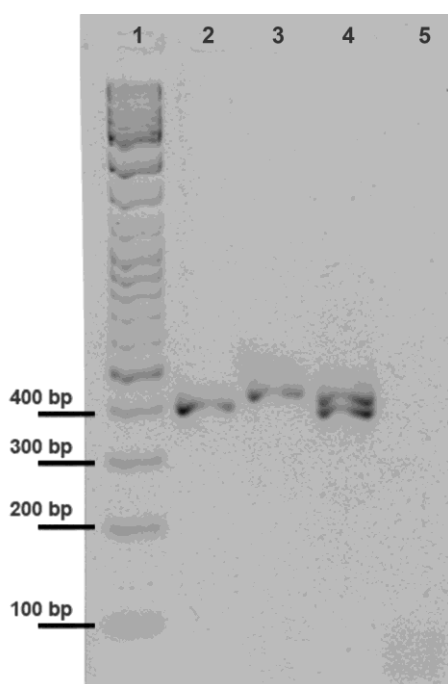

**Fig. S1** Electrophoretic analysis on 1% agarose gel: In lane 1 was used Thermo Scientific GeneRuler DNA Ladder Mix; Lane 2 and 3 Multiplex PCR products of *M. tuberculosis* and *P. falciparum*, respectively; Lane 4 Multiplex PCR product of *M. tuberculosis* and *P. falciparum*, Lane 5 negative control of the PCR reaction.

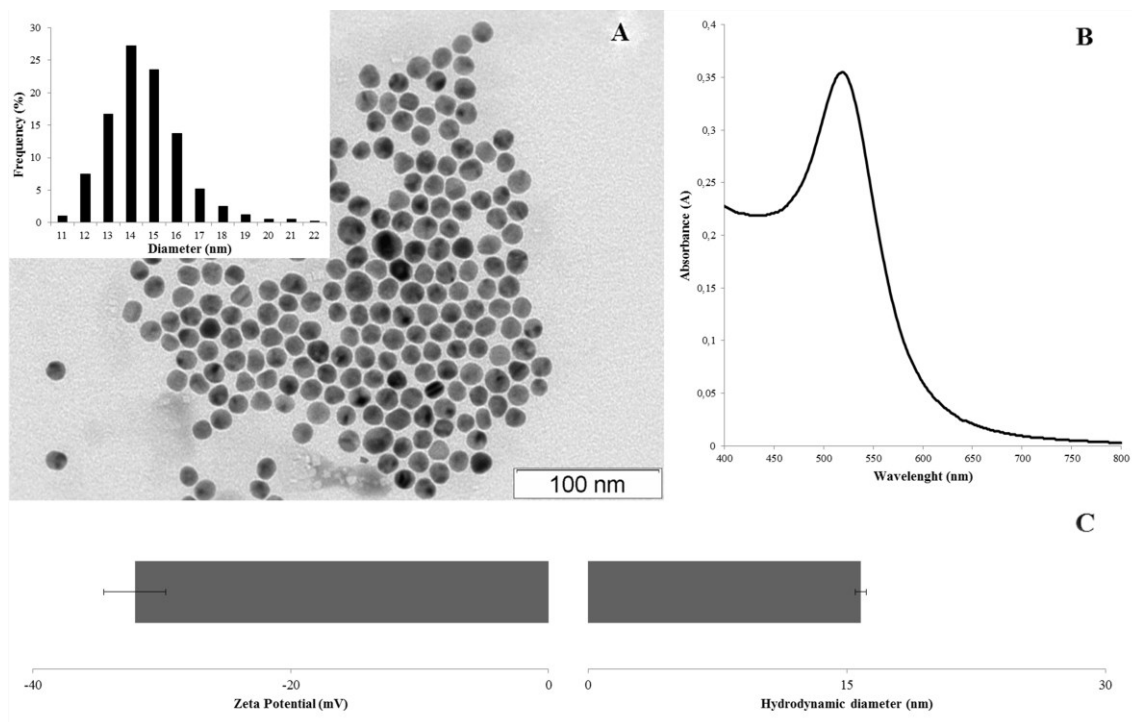

**Fig. S2** Physical characterization of the synthesized gold nanoparticles. A) Transmission electron microscopy (TEM) imaging and inset size histogram frequency from  $\approx 400$  AuNPs counting; B) UV-Vis spectrum of spherical AuNPs, with a characteristic maximum absorption peak, C) Dynamic light scattering (DLS) measurements to define the hydrodynamic diameter of the AuNPs and zeta-potential ( $\zeta$ -potential) as AuNP surface charge indicator. For DLS it was performed 3 runs per sample with 2000 measurements each and for  $\zeta$ -potential a total of 5 runs per sample with 250 measurements.

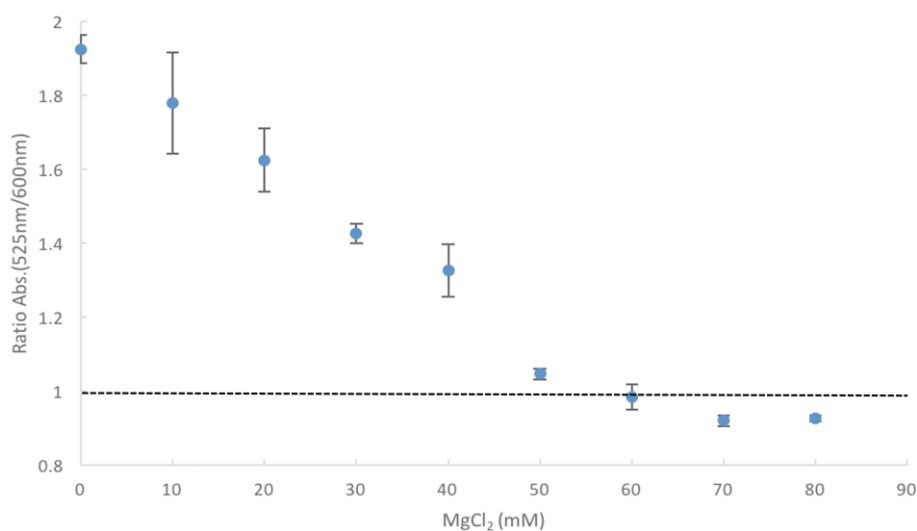

**Fig. S3** Aggregation profiles of the synthesized Au-nanoprobes. Aggregation measured as the ratio of localized surface plasmon resonance intensity at 525 nm and 600 nm for increasing salt concentrations ( $\text{MgCl}_2$ ). The minimum amount of salt required to cause aggregation was determined based on each Au-nanoprobe aggregation profiles. Ratio  $<1$  was considered for full aggregation, 60mM.

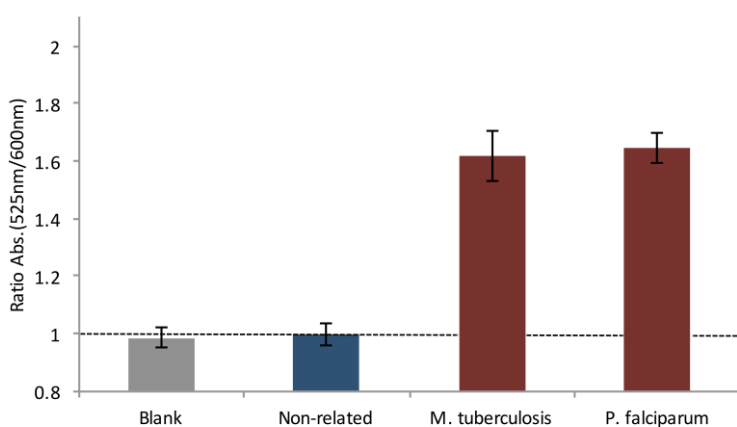

**Fig. S4** Single pathogen Au-nanoprobe specificity analysis using synthetic targets. A 1 pmol concentration of synthetic targets (see Table S1) were individually tested with a  $\text{MgCl}_2$  concentration of 60mM.
